# Supplementary material for: High-Throughput Assessment of Kinome-wide Activation States
Source: PubMed Central journal article supplement (PMC6838672; doi:10.1016/j.cels.2019.08.005), 2019-10-23
Supplement: mmc1.pdf [file mmc1.pdf]

**Cell Systems, Volume 9**

## **Supplemental Information**

### **High-Throughput Assessment of Kinome-wide Activation States**

**Thierry Schmidlin, Donna O. Debets, Charlotte A.G.H. van Gelder, Kelly E. Stecker, Stamatia Rontogianni, Bart L. van den Eshof, Kristel Kemper, Esther H. Lips, Maartje van den Biggelaar, Daniel S. Peeper, Albert J.R. Heck, and Maarten Altelaar**

# High-throughput assessment of kinome-wide activation states

Thierry Schmidlin<sup>1,2</sup>, Donna O. Debets<sup>1,2</sup>, Charlotte A.G.H. van Gelder<sup>1,2</sup>, Kelly E. Stecker<sup>1,2</sup>, Stamatia Rontogianni<sup>1,2</sup>, Bart L. van den Eshof<sup>3</sup>, Kristel Kemper<sup>4</sup>, Esther H. Lips<sup>5</sup>, Maartje van den Biggelaar<sup>3</sup>, Daniel S. Peeper<sup>4</sup>, Albert J.R. Heck<sup>1,2</sup> and Maarten Altelaar<sup>1,2,6,#,\*</sup>

1 Biomolecular Mass Spectrometry and Proteomics, Bijvoet Center for Biomolecular Research and Utrecht Institute for Pharmaceutical Sciences, Utrecht University, Padualaan 8, 3584 CH Utrecht, The Netherlands

2 Netherlands Proteomics Center, Padualaan 8, 3584 CH Utrecht, The Netherlands

3 Sanquin Research, Department of Molecular and Cellular Hemostasis, Amsterdam, the Netherlands.

4 Division of Molecular Oncology, Onco Institute, The Netherlands Cancer Institute, 1066 CX Amsterdam, the Netherlands

5 Department of Molecular Pathology, The Netherlands Cancer Institute, 1066 CX Amsterdam, the Netherlands.

6 Mass Spectrometry and Proteomics Facility, The Netherlands Cancer Institute, 1066 CX Amsterdam, the Netherlands

# To whom correspondence should be addressed: [m.altelaar@uu.nl](mailto:m.altelaar@uu.nl)

\* Lead contact

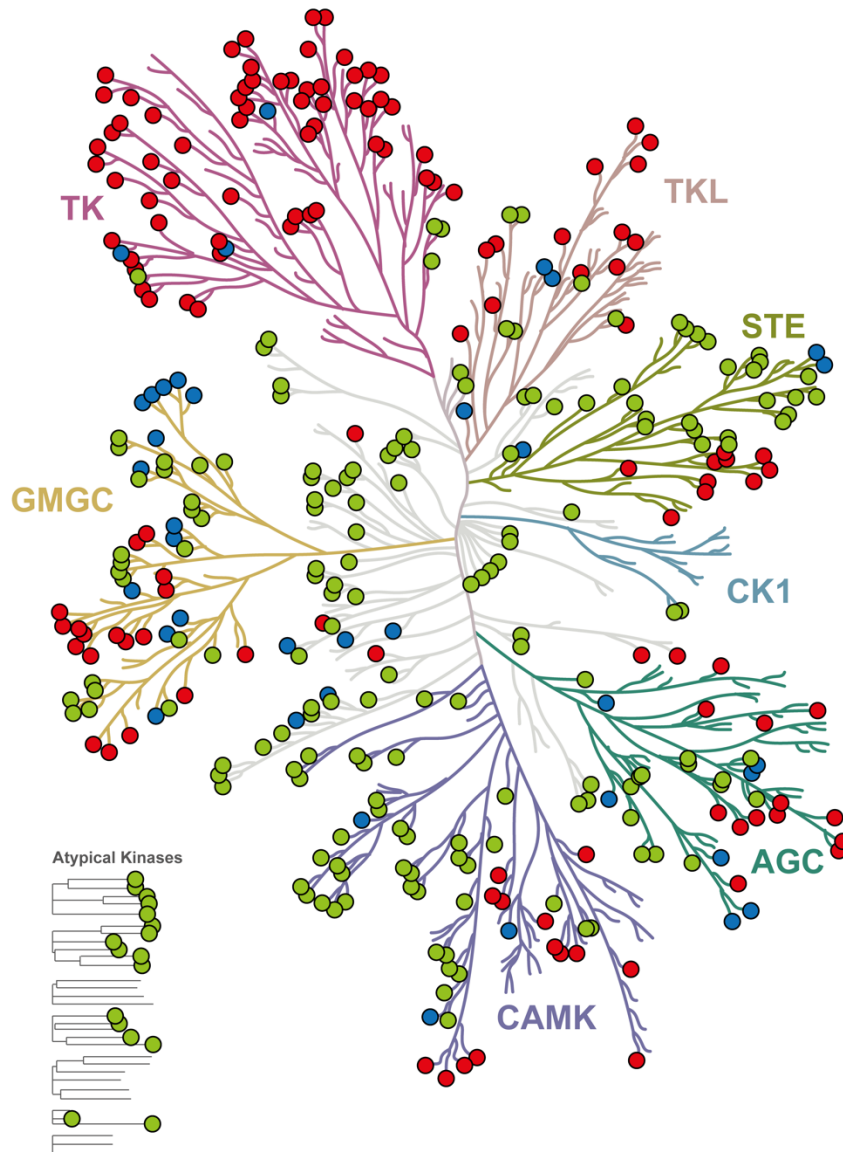

**Figure S1, Related to Figure 1:** Depiction of the human kinome indicating all kinases currently included in the t-loop screening method (blue circle), kinases being classified as understudied by Collins et al. (green circle) and the overlap of the two (red circles).

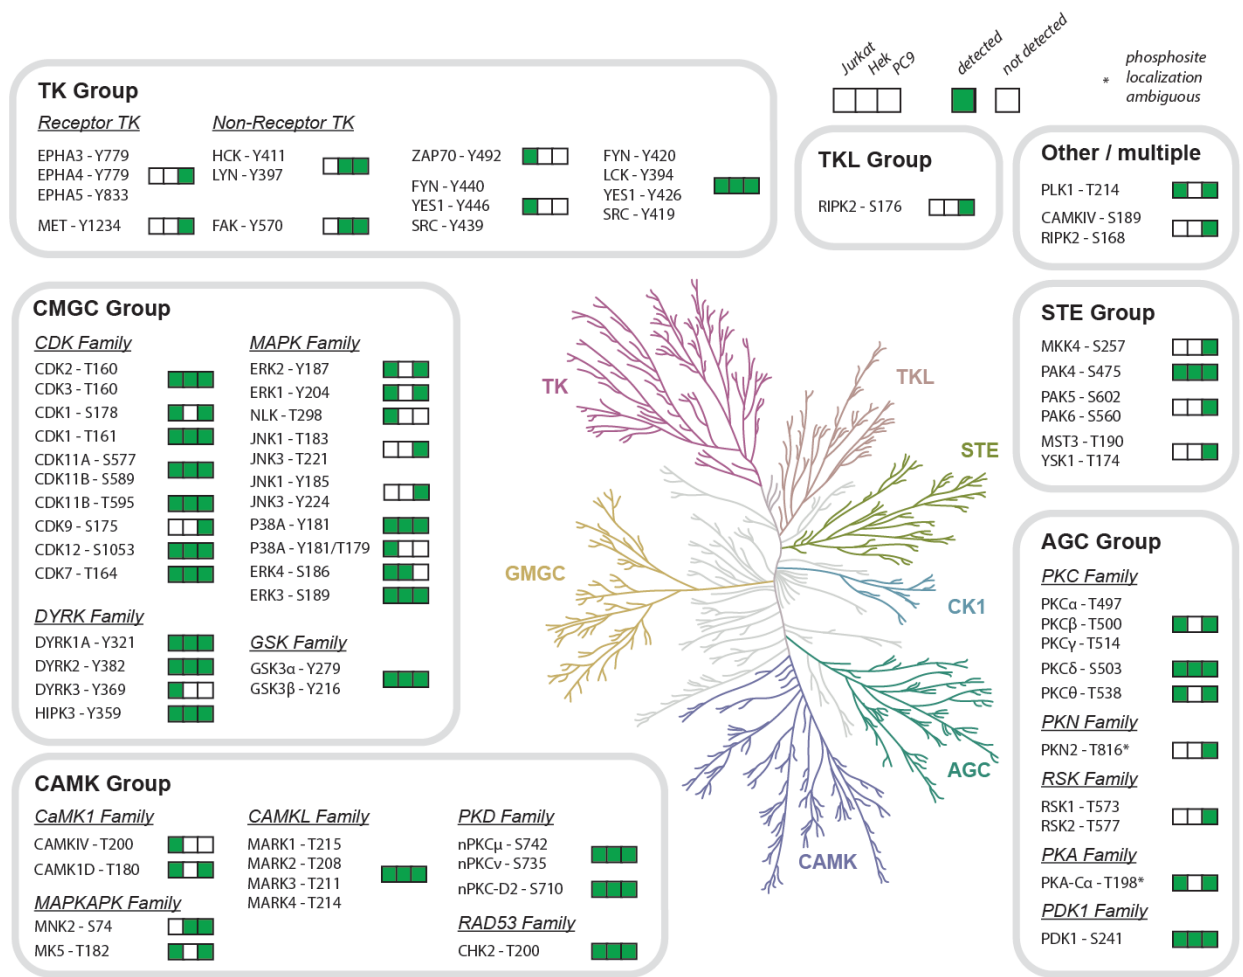

**Figure S2, Related to Figure 1:** Compendium of t-loop phosphorylations detected in Jurkat, HEK293T and PC9 cell lines cultured under standard conditions without any form of stimulation.

Literature Based Kinase-Substrate Library with Phosphosites

Run Enrichment

LYST\_Y3208  
 LYST\_Y3210  
 LYST\_Y3215  
 ESYT1\_Y822  
 CPVL\_Y266  
 SCAF1\_Y494  
 COG4\_Y441  
 CBX8\_Y106  
 BCLAF1\_Y284  
 DNAH2\_Y2902  
 DNAH2\_Y2989  
 ZC3H4\_Y158  
 SRRM2\_Y996  
 COL4A3BP\_Y291

[Submit](#) [Example](#) [Clear](#)

Library Info:

This library can be used to predict kinase activity from your input set of phosphosites. This library was made by manual curation of kinase-substrate interactions in the literature. The library terms are kinases and the elements are substrates with phosphosites.

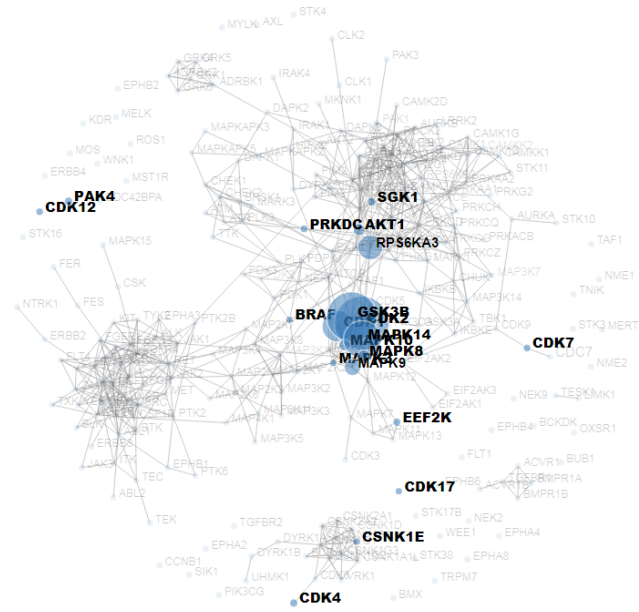

Enrichment Results:

| Term    | P-Value  |
|---------|----------|
| CDK2    | 4.86e-32 |
| GSK3B   | 4.14e-29 |
| MAPK14  | 3.12e-21 |
| CDK1    | 2.20e-17 |
| RPS6KA3 | 3.29e-13 |
| MAPK9   | 6.41e-8  |
| MAPK8   | 3.83e-5  |
| AKT1    | 4.94e-5  |
| MAPK10  | 9.03e-5  |
| SGK1    | 6.55e-3  |
| CDK4    | 1.19e-2  |
| PAK4    | 1.27e-2  |
| EEF2K   | 2.08e-2  |
| PRKDC   | 3.53e-2  |
| CDK7    | 3.85e-2  |
| CDK12   | 5.79e-2  |
| CSNK1E  | 8.34e-2  |

Found 802 phosphosites in the library

[Download Enrichment Results](#)

[Download Network SVG](#)

**MAPK14**

TP53\_S392, ESR1\_T311, BAD\_S750, MAX\_S490, MAX\_S400, STAT4\_S721, EEF2K\_S396, NCF1\_S348, NCF1\_S345, MEF2C\_S387, MEF2C\_T293, MEF2C\_T300, ATF2\_T69, ATF2\_T71, ATF2\_S90, DDIT3\_S82, DDIT3\_S79, ELK1\_S383, ELK1\_S389, SLC9A1\_S723, SLC9A1\_S726, SLC9A1\_S729,

**Figure S3, Related to Figure 2:** Screenshot of the KEA2 output reporting kinase activity determined from Jurkat cell lysates subjected to high-pH reversed phase fractionation and subsequent phosphopeptide enrichment analyzed by shotgun LC-MS.

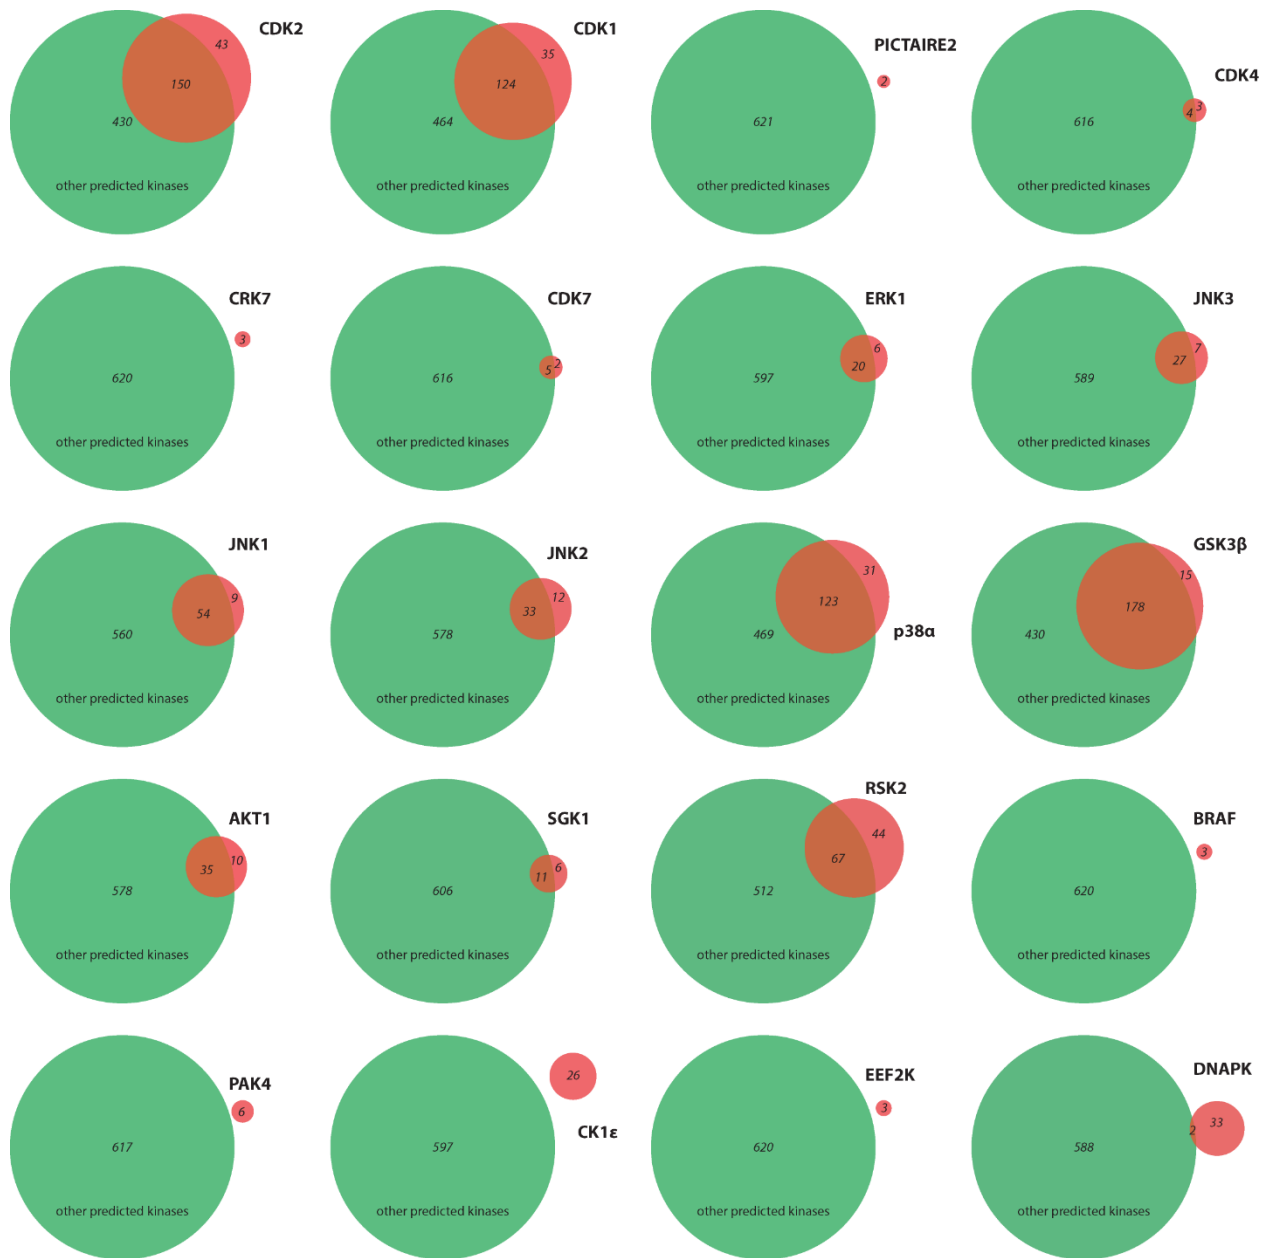

**Figure S4, Related to Figure 2:** Venn diagrams illustrating the amount of redundancy in kinase-substrate relationships impeding the kinase prediction by the online tool KEA2. Each Venn diagram compares the reported substrates to the reported substrates of the other predicted kinases.

**A**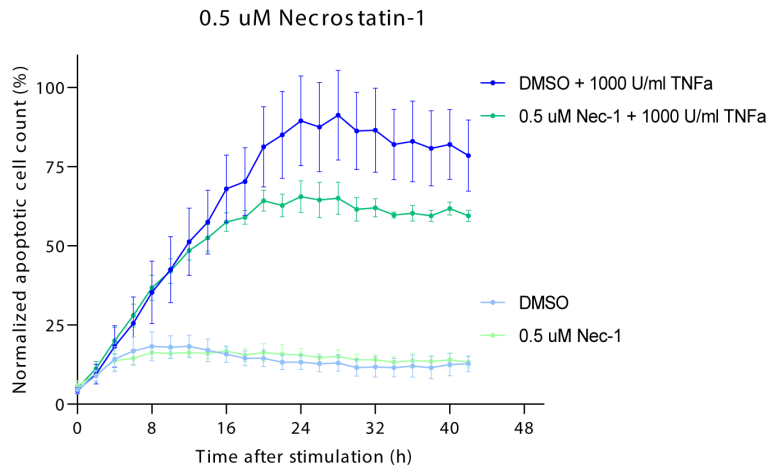**B**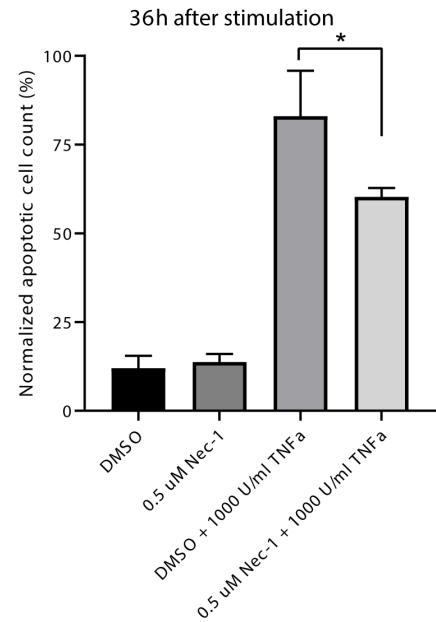

**Figure S5, Related to Figure 2:** Jurkat cell apoptosis upon TNF $\alpha$  treatment: Jurkat cells were grown with and without TNF $\alpha$  stimulation, in presence or absence of necrostatin-1 (Nec-1), and rate of cell death was determined by Caspase-3/7 green apoptosis reagent (n = 4 for all groups, error bars depicting standard deviation). (B) Apoptotic cell count after 36 hours in the different conditions showing a significant reduction in apoptotic cells after TNF $\alpha$  stimulation in the presence of Nec-1.
